**Phenome-wide association study of ovarian cancer identifies common comorbidities and reveals shared genetics with complex diseases and biomarkers**

Anwar Mulugeta<sup>1,2&3\*</sup>, Amanda L Lumsden<sup>1&2</sup>, Iqbal Madakkatel<sup>1&2</sup>, David Stacey<sup>1&2</sup>, S.Hong Lee<sup>1,2&4</sup>, Johanna Mäenpää<sup>5&6</sup>, Martin K. Oehler<sup>7&8</sup>, Elina Hyppönen<sup>1&2</sup>

<sup>1</sup>Australian Centre for Precision Health, Unit of Clinical and Health Sciences, University of South Australia, Adelaide, Australia

<sup>2</sup>South Australian Health and Medical Research Institute, Adelaide, Australia

<sup>3</sup>Department of Pharmacology and Clinical Pharmacy, College of Health Science, Addis Ababa University, Addis Ababa, Ethiopia

<sup>4</sup>UniSA Allied Health & Human Performance, University of South Australia, Adelaide, SA, Australia

<sup>5</sup>Faculty of Medicine and Medical Technology, Tampere University, Tampere, Finland

<sup>6</sup>Cancer Centre, Tampere University and University Hospital, Tampere, Finland

<sup>7</sup>Department of Gynaecological Oncology, Royal Adelaide Hospital, Adelaide, SA, Australia

<sup>8</sup>Adelaide Medical School, Robinson Research Institute, University of Adelaide, Adelaide, SA, Australia

**Short title:** MR-PheWAS of ovarian cancer

**Funding:** This research was funded by Medical Research Future Fund of Australia (MRF2007431).

**Competing interests:** The authors declare that they have no competing interests.

**\*Corresponding author:**

Dr Anwar Mulugeta

Australian Centre for Precision Health, c/o SAHMRI, University of South Australia, Adelaide, Australia, GPO Box 2471, Adelaide SA 5001.

Email: [anwarmulugeta.gebremichael@unisa.edu.au](mailto:anwarmulugeta.gebremichael@unisa.edu.au)

1 **Abstract**

2 **Background:** Ovarian cancer (OC) is commonly diagnosed among older women who have  
3 comorbidities. This hypothesis-free phenome-wide association study (PheWAS) aimed to identify  
4 comorbidities associated with OC, as well as traits that share a genetic architecture with OC.

5 **Methods:** We used data from 181,203 white British female UK Biobank participants and analysed  
6 OC and OC subtype-specific genetic risk scores (OC-GRS) for an association with 889 diseases and  
7 43 other traits. We conducted PheWAS and colocalisation analyses for individual variants to identify  
8 evidence for shared genetic architecture.

9 **Results:** The OC-GRS was associated with 10 diseases, and the clear cell OC-GRS was associated  
10 with five diseases at the FDR threshold ( $p = 5.6 \times 10^{-4}$ ). Mendelian randomisation analysis (MR)  
11 provided robust evidence for the association of OC with higher risk of “secondary malignant  
12 neoplasm of digestive systems” (OR 1.64, 95% CI 1.33, 2.02), “ascites” (1.48, 95% CI 1.17, 1.86),  
13 “chronic airway obstruction” (1.17, 95% CI 1.07, 1.29), and “abnormal findings on examination of  
14 the lung” (1.51, 95% CI 1.22, 1.87). Analyses of lung spirometry measures provided further support  
15 for compromised respiratory function. PheWAS on individual OC variants identified five genetic  
16 variants associated with other diseases, and seven variants associated with biomarkers (all,  $p \leq 4.5 \times 10^{-8}$ ).  
17 Colocalisation analysis identified rs4449583 as the shared causal variant for OC and seborrheic  
18 keratosis.

19 **Conclusions:** OC is associated with digestive and respiratory comorbidities. Several variants  
20 affecting OC risk were associated with other diseases and biomarkers, with this study identifying a  
21 novel genetic locus shared between OC and skin conditions.

22

23 **Keywords:** Ovarian cancer, comorbidities, *TERT*, PheWAS, UK Biobank

24

25 **1. Introduction**

26 Ovarian cancer (OC) is a notorious gynaecological disorder, with only 44% of affected women  
27 surviving 5 years.<sup>1</sup> Reducing mortality associated with OC remains a challenge as the poor  
28 understanding of the origin and biology of the disease limits opportunities to prevention, and the  
29 disease is typically detected at an advanced stage when treatment options are limited.<sup>2</sup> Approximately  
30 90% of OC are epithelial OC and arise from epithelial cells, predominantly of the fallopian tube and  
31 endometrium.<sup>2-4</sup> Epithelial OC can be further classified into serous, endometrioid, clear cell, and  
32 mucinous subtypes, based on their histological characteristics<sup>3</sup> and indeed, the pathogenesis, disease  
33 progression, and risk factors are known to vary between OC subtypes.<sup>3,5</sup> Given that OC is commonly  
34 diagnosed in women aged 50 years and above,<sup>6</sup> many patients present with at least one comorbidity,  
35 which can influence treatment decisions, impact prognosis and affect overall survival.<sup>7,8</sup> Hence,  
36 exploring the associations between OC and comorbidities, along with understanding potential shared  
37 genetic links between OC and other traits, may offer insights into the underlying etiology of the  
38 disease. Such insights could lead to facilitating earlier detection and better management of the disease.

39 Phenome-wide association study (PheWAS) is a powerful approach for testing the association of  
40 genetic variants or their risk score with a broad range of phenotypes and disease outcomes.<sup>9</sup> This  
41 approach offers the advantage of being hypothesis-free, allowing it to explore numerous associations  
42 without constraints of the number of outcomes. Consequently, PheWAS has the potential to unveil  
43 novel genetic associations with diseases.<sup>9</sup> In this study we use data on genetic OC risk variants and  
44 889 disease outcomes from 181,203 female UK Biobank participants to identify comorbidities and  
45 clinical characteristics associated with the genetic risk of OC. We test for evidence of a direct  
46 association between OC and possible comorbidities using Mendelian randomisation (MR), an  
47 approach less susceptible to confounding and reverse causation,<sup>10</sup> and extend these analyses to focus  
48 on the genetic risk reflecting distinct histological OC subtypes. We also use the PheWAS approach to  
49 explore each OC associated variant individually, which can provide evidence for shared genetic  
50 contributions, and provide insight into the underlying disease mechanisms.

51

## 52 **2. Methods**

### 53 **2.1. Study population**

54 UK Biobank is a prospective cohort study of half a million participants with rich phenotype and  
55 genotype data collected across 22 centres in England, Scotland, and Wales. The baseline assessment  
56 was conducted between 2006 and 2010 when the participants were aged between 37 to 73 years.<sup>11</sup> A  
57 wide range of data was collected, including sociodemographic information, lifestyle factors, physical  
58 measures, blood and urine samples for biomarker and genetic profiling, with continuing updates  
59 through follow-up assessments and linkage with electronic health records and death registrations.<sup>11</sup>  
60 For the primary analyses in this study, we restricted the sample to 181,203 female participants who  
61 were of white British ancestry and were not genetically related (Figure S1) and included male  
62 participants in sensitivity analyses (n =156,220). The study was conducted under UK Biobank  
63 application number 89630. UK Biobank obtained informed consent from all participants to collect and  
64 use linked data for future research use, and the UK Biobank study has ethical approval from the  
65 National Information Governance Board for Health and Social Care and Northwest Multicenter  
66 Research Ethics Committee (11/NW/0382).

67

### 68 **2.2. Disease outcomes and biomarkers**

69 We used International Classification of Diseases (ICD version 9 and 10) codes from hospital episode  
70 statistics and death registrations to identify disease outcomes (Supplementary methods). We mapped  
71 ICD-9/10 codes to phecodes, which are composite groupings reflecting clinically relevant disease  
72 outcomes.<sup>12</sup> We defined individuals with the phecode-of-interest as cases, and those without the  
73 phecode-of-interest, or any other phecodes from the same disease category as controls  
74 (Supplementary methods).<sup>12, 13</sup> We included all phecodes with at least 200 cases in our analyses,<sup>14</sup>  
75 resulting in 889 phecodes from 18 disease categories (Table S1).

76 We also included 30 serum and four urine biomarkers, which are commonly used for the diagnosis  
77 and monitoring of chronic diseases, as outcome measures (Supplementary methods). Additional  
78 analyses were conducted against selected physiological characteristics (namely body mass index  
79 (BMI), body fat percentage (BFP), basal metabolic rate (BMR), blood pressures, and measures of  
80 lung function (spirometry) due to their known associations with comorbidity risks. The spirometry  
81 measures included forced expiratory volume in 1-second (FEV1), forced vital capacity (FVC),  
82 FEV1/FVC ratio, and peak expiratory flow (PEF).

### 83 **2.3. Genetic variants and genetic risk score**

84 We selected 35 genetic variants associated with OC from previous genome-wide association studies  
85 (GWAS), including the 12 novel variants identified in the most recent GWAS<sup>15</sup> and 23 variants  
86 identified in earlier GWASs (minor allele frequency  $\geq 1.4\%$ , Table S2, Figure S2).<sup>16-23</sup> We  
87 constructed the genetic risk score (GRS) using 31 genetic variants after excluding one variant that had  
88 no proxy at  $r^2 \geq 0.8$  (rs555025179), and three variants (rs12131772, rs4691139, and rs12938171) that  
89 were not replicated in the recent GWAS,<sup>15</sup> which we extracted from the imputed genotype UK  
90 Biobank data<sup>24</sup> (Table S2). The GRS was constructed for each individual by summing the weighted  
91 number of OC risk-associated variants, with the weight taken from the recent OC GWAS.<sup>15</sup> We also  
92 constructed risk scores for each OC subtype (Supplementary methods).

### 93 **2.4. Statistical analyses**

94 We conducted phenome-wide analyses using R-package PheWAS<sup>25</sup> which allowed us to fit logistic  
95 regression (889 disease outcomes) or linear regression (43 biomarkers/physiological characteristics)  
96 against the OC GRS with all models adjusted for age, assessment centre, type of genotyping array,  
97 birth location, and 40 principal components (Figure S2). We repeated the phenome-wide analyses for  
98 each OC subtype GRS to identify subtype-specific disease associations, and further, conducted the  
99 analyses in male participants to understand whether the OC – disease associations involve non-sex-  
100 specific mechanistic pathways.

101 The phenome-wide association signals that passed the FDR threshold ( $p < 5.6 \times 10^{-4}$  for the diseases  
102 and  $p < 0.02$  for the biomarkers and physiological measures, Supplementary methods) were taken  
103 forward to MR analysis to examine evidence for direct association with OC. We used two-sample MR  
104 approach where variant – OC association estimates were taken from the recent OC GWAS,<sup>15</sup> and the  
105 variant-outcome association estimates were from the UK Biobank. MR analyses were conducted on  
106 signals associated with the overall OC GRS or with any subtype-based GRSs. We used inverse  
107 variance weighted (IVW) MR<sup>26</sup> as the primary method and conducted sensitivity analyses using  
108 weighted median,<sup>27</sup> weighted mode,<sup>28</sup> MR-PRESSO,<sup>29</sup> and MR-Egger,<sup>30</sup> with each method working on  
109 different pleiotropic assumptions (Supplementary methods). We tested for horizontal pleiotropy using  
110 MR-Egger intercept, MR-PRESSO outlier and distortion tests, leave-one-out and leave-block-out  
111 methods (Table S3, Supplementary methods). MR analyses were repeated excluding the OC cases. To  
112 test the MR assumption that the genetic instrument should not be associated with potential  
113 confounding factors, we explored the association between the OC GRSs and age, education,  
114 Townsend deprivation index, BMI, physical activity, and alcohol consumption (Supplementary  
115 methods, Table S4).

116 We repeated the phenome-wide analyses for each OC genetic variant individually, again conducting  
117 analyses separately for men. We assessed the novelty of the PheWAS findings by checking the  
118 reported associations in the GWAS Catalog. We considered a locus-trait association as potentially  
119 novel if neither the lead variant nor any variant in linkage disequilibrium (LD) with the lead variant  
120 (with an  $r^2 \geq 0.1$ ) had previously been reported to be associated with the same or related traits. For  
121 those potentially novel associations, we conducted a follow-up colocalisation analysis using the  
122 HyPrColoc (Hypothesis Prioritization in multi-trait Colocalisation) tool to assess whether there is  
123 evidence of shared causal genetic variants between pairs of traits.<sup>31</sup> We considered a posterior  
124 probability of full colocalisation (PPFC)  $> 0.64$  as indicative of shared genetic etiology between these  
125 traits (Supplementary methods).<sup>31</sup>

126 Statistical analyses were performed using STATA SE version 17.1, R version 4.2.1 and PLINK2.<sup>32</sup>

127 **3. Results**

128 We included up to 181,203 female white British participants in the primary analyses, of whom 1,863  
129 (1.3%) had been diagnosed with OC (Table 1). The prevalence of OC was higher among participants  
130 who were older, obese, never drinkers of alcohol, and those with poor general health status at the  
131 baseline (for all, prevalence  $\geq 1.2\%$ , and  $p \leq 0.03$ ). The OC risk GRS was normally distributed and  
132 associated with OC as expected, with stronger association in the highest compared to the lowest  
133 genetic risk group (F-statistics =23.7,  $p = 4.4 \times 10^{-16}$ , Figure S3). No associations were found between  
134 the risk scores and potential confounders after correction for multiple testing (Table S5).

135 **3.1. Phenome-wide-based Mendelian randomisation**

136 We investigated 889 disease outcomes from 18 disease categories in the phenome-wide analyses. We  
137 observed significant associations between the OC GRS and 10 diseases from four disease categories  
138 (neoplasms, digestive, respiratory and genitourinary diseases) after FDR correction ( $p \leq 5.6 \times 10^{-4}$ ).  
139 The top signals were for “cancer of the female genital organs”, “malignant neoplasm of ovary and  
140 other uterine adnexa”, and “malignant neoplasm of the ovary”, which confirms the ‘relevance  
141 assumption’ of the MR approach<sup>10</sup> (Supplementary methods) for using the GRS as instrument for OC  
142 (for all,  $p \leq 4.8 \times 10^{-4}$ , Figure 1, Panel A). The GRS was also associated with higher risk of other  
143 cancers and abnormal growths including “secondary malignant neoplasm of digestive systems”,  
144 “lipoma, including lipoma of skin and subcutaneous tissue” ( $p \leq 3.9 \times 10^{-4}$ ), and “ovarian cyst” ( $p = 6.0$   
145  $\times 10^{-5}$ ). In addition, we identified associations with respiratory outcomes including “chronic airway  
146 obstruction” and “abnormal findings on examination of the lungs”, and with the digestive system  
147 outcome, “ascites” ( $p \leq 3.2 \times 10^{-4}$ ).

148 In analyses using GRSs for specific OC subtypes (Figure 1 Panel B and C), the clear cell OC GRS  
149 was associated with additional diseases and increased risks such as “benign neoplasm of uterus”, and  
150 “uterine leiomyoma”, “disorders of menstruation”, “gram negative septicemia”, and “postoperative  
151 infection” (for all,  $p \leq 2.3 \times 10^{-4}$ ). Overall, in addition to overall OC-related outcomes, 12 other  
152 disease outcomes were associated with at least one form of the OC GRS. Notably, none of these  
153 associations were detected when we repeated the phenome-wide analyses among men (Figure S4).

154 Additionally, our phenome-wide analyses on 43 quantitative traits, which included serum and urine  
155 biomarkers and physiological measures, identified an association of OC GRS with 13 traits.  
156 Furthermore, we found an additional 11 traits associated with at least one subtype of OC GRS (Figure  
157 S5).

158 We conducted two-sample MR analyses on 12 disease outcomes identified in the PheWAS. For each  
159 outcome, evidence of causality was identified for at least one type of OC (Figure 2). We found robust  
160 evidence supporting the association between a higher genetic liability of OC and an increased risk of  
161 “secondary malignant neoplasm of digestive systems” (OR 1.64, 95% CI 1.33, 2.023), “ascites” (1.48,  
162 95% CI 1.17, 1.86), “chronic airway obstruction” (1.17, 95% CI 1.07, 1.29), and “abnormal finding  
163 on the examination of the lungs” (1.51, 95% CI 1.22, 1.87). These associations were further supported  
164 by other MR methods (Figure S6). Additionally, we observed an association between a higher genetic  
165 liability of OC and an increased risk of “ovarian cyst” (1.23, 95% CI 1.04, 1.46), as well as “lipoma  
166 including lipoma of skin and subcutaneous tissues” (1.31, 95% CI 1.06, 1.61). Notably, the weighted  
167 median and weighted mode MR methods specifically supported the association with “lipoma of the  
168 skin and subcutaneous tissues” (Figure S6). There was some evidence supporting the association  
169 between OC and higher risk of “postoperative infection” and “gram-negative septicemia”, identified  
170 in the phenome-wide analyses on clear cell OC. However, these associations were observed only in  
171 the IVW and MR-PRESSO MR methods (Figure S6). In the MR analyses on OC subtypes (Figure 2),  
172 serous, endometrioid and clear cell OC were all associated with “secondary malignant neoplasm of  
173 digestive systems” and “ascites”. Serous and endometrioid subtypes showed evidence of effects on  
174 the respiratory outcomes. While the case numbers were lower for mucinous OC, this histotype was the  
175 only one to show evidence of an association with “lipoma of the skin and subcutaneous tissues” as  
176 evidenced by all MR methods. However, mucinous OC was not associated with any of the other  
177 outcomes (Figure S6). The clear cell subtype was associated with “ovarian cyst”, “benign uterine  
178 neoplasms”, “uterine leiomyoma”, and “disorders of menstruation”. Both serous and clear cell  
179 subtypes increased the risk of postoperative infection traits, with clear cell also increasing risk for  
180 “gram negative septicemia” (Figure 2 & Figure S6). We conducted analyses also excluding all known



181 OC cases, and associations with “secondary malignant neoplasm of digestive systems” and “ascites”  
182 were attenuated, while estimates for all other outcomes were generally similar to the main findings  
183 (Figure S7). The MR-Egger intercept did not suggest evidence of pleiotropy for most associations,  
184 except for the association between serous OC and “postoperative infections” ( $p_{\text{intercept}}=0.01$ ), which  
185 therefore should be cautiously interpreted. No evidence of pleiotropy was found using the MR-  
186 PRESSO outlier test and leave-one-out analysis (Figure S8). The estimates obtained from leave-  
187 block-out analyses were broadly consistent with the overall findings (Figure S9).

188 MR analyses on serum biomarkers and physiological measures supported the association of  
189 OC with lower FVC, endometrioid OC with lower oestradiol, clear cell OC with lower total  
190 cholesterol, low density lipoprotein (LDL) cholesterol, and apolipoprotein B (ApoB), and mucinous  
191 OC with higher gamma glutamyltransferase (GGT) and alanine aminotransferase (ALT) and lower  
192 creatinine levels (Figure S10). Analyses excluding all known OC cases, provided generally similar  
193 estimates to the main findings (Figure S11). For these identified associations, we did not find any  
194 evidence of pleiotropy based on the MR-Egger intercept tests ( $p_{\text{intercept}} \geq 0.13$ ) and leave-one-out  
195 analyses. MR analyses on men provided evidence for a genetic association between mucinous OC and  
196 ALT (Figure S10).

### 197 **3.2. Shared genetic architecture**

198 In the phenome-wide analyses assessing associations with individual OC risk-associated genetic  
199 variant, five variants were associated with at least one of 15 (11 distinct) disease outcomes (all,  $p \leq 4.5$   
200  $\times 10^{-8}$ , Figure 3, Table S6), and seven variants were associated with at least one of 22 biomarkers and  
201 physiological measures (Figure S12). Some of these associations were also observed in the analyses  
202 among men, with selected OC variants affecting conditions of the male genital organs (Figure 3,  
203 Table S6 and Figure S12, Supplementary Results). To ensure the novelty of our findings, we  
204 extensively checked the GWAS Catalog for any reports of associations with the identified (or related)  
205 diseases involving the lead or proxy variants ( $r^2 \geq 0.1$ ). As a result, we uncovered potential novel  
206 associations between the OC risk-increasing allele from the *TERT* locus (rs10069690-T) and a lower

207 risk of “seborrheic keratosis” (0.79, 95% CI 0.72, 0.87), in females, with similar a finding observed in  
208 males. To further validate the associations, we conducted colocalisation analysis at the *TERT* locus  
209 (LD block of chr5:982252 to chr5:2132442, human genomic build of hg19) and identified rs4449583  
210 as the candidate causal variant explaining around 70% of 0.9239 PPFC for OC-“seborrheic keratosis”  
211 (Figure 4). This variant is also strongly associated with OC in the Phelan OC GWAS<sup>15</sup> ( $p = 7.8 \times 10^{-12}$ ),  
212 and in LD with the index variant from this GWAS (rs7705526,  $r^2 = 0.784$ ) and with the lead variant in  
213 the primary discovery OC GWAS<sup>22</sup> (rs100699690,  $r^2 = 0.432$ , Supplementary Methods). The  
214 association between the *GPX6* locus and “disorders of iron metabolism” and “celiac disease” are  
215 potentially novel, although colocalisation analysis did not suggest that OC share the same causal  
216 variants with these two diseases (Figure S13). On the contrary, we identified independent potential  
217 causal genetic variant for each “disorders of iron metabolism” (rs34409925,  $r^2 = 0.207$  with  
218 rs6456822) and “celiac disease” (rs3131101,  $r^2 = 0.049$  with rs6456822) in further conditional analysis  
219 (Figure S13).

220

#### 221 4. Discussion

222 In this large-scale phenome-wide study, we aimed to explore comorbidity risks associated with OC,  
223 with additional analyses to identify subtype-specific associations based on genetic variants reflecting  
224 different OC histological types. We found evidence supporting a possible causal association between  
225 OC and 12 disease outcomes, including “secondary malignant neoplasm of the digestive system”,  
226 “ascites”, and respiratory disorders. We also identified some additional subtype-specific associations,  
227 including clear cell OC showing links with “gram-negative septicemia”, “uterine leiomyoma” and  
228 “disorders of menstruation”, and mucinous OC with “lipoma of the skin and subcutaneous tissue”.  
229 Analyses using 43 biomarkers also identified an association with seven biomarkers and these findings,  
230 along with those from disease analyses, may have important implications for improving the clinical  
231 management of patients with OC. Moreover, our exploration of each OC-risk increasing variant in the  
232 PheWAS revealed a set of traits that are genetically shared with OC. This analysis not only confirmed  
233 previous GWAS findings but also shed light on novel associations deserving further investigations.

234 OC is the leading cause of cancer-related ascites in females.<sup>33</sup> Our MR-PheWAS study revealed  
235 genetic evidence linking ascites to OC across all subtypes except mucinous OC, which is consistent  
236 with the fact that over one-third of women with OC develop ascites during their lifetime.<sup>33, 34</sup> Ascites  
237 is commonly considered a sign of advanced OC,<sup>35</sup> and in line with this, the evidence for an  
238 association in our analyses was removed after excluding known OC cases. In patients with OC, the  
239 presence of ascites commonly indicates metastasis to peritoneal surfaces and reflects the extent of the  
240 disease.<sup>36</sup> Our study further established a causal association between OC and “secondary malignant  
241 neoplasms of the digestive system”, indicating intra-abdominal dissemination of the tumour. Again,  
242 this association was sensitive to the inclusion of known OC cases in our analyses, and is likely to  
243 explained by a metastasis of the OC affecting the gastrointestinal tract or, potentially, a new  
244 synchronous gastrointestinal cancer.

245 OC has also been linked to respiratory complications.<sup>37, 38</sup> Our study provides additional supporting  
246 evidence for this association, specifically linking OC to an increased risk of “chronic airway

247 obstruction” and “abnormal lung examinations”. The findings were further supported by spirometry  
248 measures, which showed a significant association between a higher genetic liability to OC and lower  
249 FVC. While in women with OC lowering of lung function may follow from malignant pleural  
250 effusion and tumour metastasis to the pleura<sup>37</sup> or complications related to surgical procedures,<sup>38</sup> in our  
251 analysis the association with lung disease remained when OC cases were excluded, and the  
252 spirometric association was seen both in women and in men, which may indicate a more profound  
253 biological link.

254 OC as reflected by our genetic study arises from the epithelium of the ovaries, endometrium and  
255 fallopian tubes, and while most of the lung also consists of epithelium, a direct link has not been well  
256 established. Interestingly, colocalisation analyses in our study also suggested that disorder of skin  
257 condition (seborrheic keratosis) shared a genetic locus (*TERT*, encoding the enzyme, telomerase) with  
258 OC, highlighting potential shared pathomechanisms involving the epithelium, and implicating  
259 telomerase function in the opposing risks of OC and the skin disorder.<sup>39,40</sup>

260 Debulking cytoreductive surgery is the standard procedure for advanced OC. It involves the surgical  
261 removal of female reproductive organs such as the ovaries, fallopian tubes, uterus, as well as  
262 omentum and organs of the digestive system, such as the bowel, depending on the stage of OC.<sup>41</sup> The  
263 invasive nature of this intervention,<sup>41</sup> combined with compromised immune system function resulting  
264 from the disease,<sup>42</sup> may explain the observed association between OC and “postoperative infection”  
265 and “gram-negative septicemia”. It is important to note that these associations were predominantly  
266 observed in clear cell OC, which has also been associated with “benign neoplasms of the uterus”,  
267 “uterine leiomyoma”, and “disorders of menstruation”. The presence of these conditions, which  
268 primarily involve the uterine tissue, could reflect the well-established association between  
269 endometriosis and clear cell OC.<sup>43,44</sup> Our study also identified OC subtype specific associations  
270 between mucinous OC and “lipoma of the skin and subcutaneous tissue”. Regarding the biomarkers,  
271 endometrioid OC was associated with lower serum oestradiol level, clear cell OC was associated with  
272 lower serum total cholesterol, LDL cholesterol, and ApoB, while mucinous OC was associated with  
273 higher serum GGT and ALT as well as lower creatinine levels. These findings suggests that

274 comorbidities and selected biomarkers may play a role in identifying and characterising different  
275 subtypes of OC.

276 Beyond the causal link between OC and disease outcomes and biomarkers, genetic variants  
277 contributing to a higher risk of OC may also be associated with other diseases and biomarkers. The  
278 *ABO* locus is a well-known pleiotropic locus with established associations with cardiovascular and  
279 cerebrovascular traits.<sup>45-50</sup> Our study confirmed these existing findings, as we also observed  
280 associations between the *ABO* variant and conditions such as “pulmonary heart disease”,  
281 “thrombophlebitis”, and “other disorders of circulatory system”. Additionally, we confirmed the  
282 association between *ABO* with many cardiometabolic biomarkers, including associations with markers  
283 of glucose and liver metabolism, confirming the highly pleiotropic nature of this variant.<sup>51</sup>

284 Our study identified a significant association between the *GPX6* variant (rs6456822) and a lower risk  
285 of disorders related to iron metabolism, which is a critical component of overall health.<sup>52</sup> However,  
286 while the lead variant rs6456822 showed this association, our colocalisation analysis identified an  
287 independent potential causal variant, rs34409925, for “disorders of iron metabolism”. We also found  
288 another potential causal variant at the *GPX6* locus, rs3131101, for “celiac disease”. The OC lead  
289 variant rs6456822 was also associated with total protein levels in women, as well as with SHBG  
290 levels in men. Our study also identified a potential novel association between the *TERT* locus  
291 (rs10069690) and “seborrhic keratosis”. The follow up colocalisation analysis strengthened the  
292 shared genetic structures between this skin condition and OC, further suggesting that rs444583 may  
293 be a causal variant. Importantly, we confirmed previous associations of the *TERT* variant with uterine  
294 leiomyoma<sup>44, 53</sup> and total protein levels in women<sup>49, 51</sup>, as well as with prostate cancer in men.<sup>54</sup> Our  
295 findings highlight the value of using PheWAS for validating previous GWAS findings and identifying  
296 potential novel variants for multiple traits including diseases and biomarkers that never been tested  
297 before.<sup>55</sup>

298 Our study has a number of strengths. Firstly, it is the largest (n =181,203) and most comprehensive  
299 study to date that examines the health risks associated with a higher genetic susceptibility to OC.

300 Secondly, by including OC subtypes in our analysis, our study can identify subtype-specific  
301 comorbidities, supporting more effective treatment and management. Lastly, our study extended the  
302 phenome-wide analyses to each OC-risk-increasing variant. This approach enables us to confirm  
303 previously identified variant-disease associations and also identify potential novel associations, thus  
304 providing a more comprehensive understanding of the shared genetic links between OC and other  
305 diseases. Further incorporation of colocalisation analysis is another strength of this study. It provided  
306 evidence of a shared genetic locus (*TERT*) between OC and “seborrheic keratosis”, and identified a  
307 potential novel causal variant, rs4449583, for this skin condition.

308 Our study also has some limitations. To ensure the validity of MR, the genetic instrument used must  
309 be associated with the risk factor (in our case, OC), not associated with the confounders of the risk  
310 factor-outcome association, and not influence the outcome except through its association with the risk  
311 factor. While we used a genetic instrument that associates with OC and conducted our analysis on a  
312 white-European population while adjusting for confounding factors, we cannot rule out the absence of  
313 horizontal pleiotropic effects, which will affect interpretation and can bias the MR estimates.<sup>56</sup> To  
314 address this concern, we repeated our analysis in men to further verify whether the association we  
315 observed is genuinely related to OC or a reflection of genetic variants indicating shared mechanistic  
316 pathways between both men and women. Another potential limitation of our study is that the UK  
317 Biobank participants are relatively healthy compared to the general population,<sup>57</sup> introducing to  
318 collider bias due to the “healthy volunteer” selection bias.<sup>58</sup> However, the modest collider bias in the  
319 context of MR is less likely to affect MR results significantly when the selection into the study was  
320 not strongly influenced by the risk factor.<sup>58</sup> Furthermore, the presence of biologically plausible causal  
321 associations in our study provides support for the validity of our results despite this limitation. It could  
322 be noted as a limitation of our study that our investigation into comorbidities associated with OC was  
323 primarily conducted in a population predominantly not diagnosed with OC. However, sensitivity  
324 analyses excluding all known OC cases confirmed that the associations with OC complications  
325 relating to ascites and gastrointestinal metastases are related to the disease *per se*, while the other

326 observed disease and trait associations may reflect earlier stages of OC development or other  
327 underlying biological differences.

328 In conclusion, our study identified robust associations between OC and comorbidities related to the  
329 digestive and respiratory systems. Furthermore, we observed specific robust associations for different  
330 subtypes of OC, such as “gram-negative septicemia”, “uterine leiomyoma” and “disorders of  
331 menstruation” for clear cell OC, and lipoma for mucinous OC. Interestingly, our study points to a  
332 shared genetic architecture between OC and a skin condition, leading to a discovery of a novel variant  
333 which merits further investigation.

334

335 **Funding**

336 This study was supported by Medical Research Future Fund of Australia (MRFF), grant number  
337 2007431.

338

339 **Competing interests**

340 The authors declare that they have no competing interests.

341

342 **Acknowledgements**

343 The authors are very grateful to the UK Biobank and UK Biobank Participants.

344

345 **Authors' contributions**

346 AM conceived the study with EH, conducted the analysis, and wrote the first draft. E.H. supervised  
347 the study and advised on analyses. DS conducted the colocalisation analysis using summary results  
348 generated by AM. All authors interpreted the results, revised the manuscript, and approved the final  
349 manuscript.

350

351 **Ethical approval**

352 The study was conducted under UK Biobank application number 89630. UK Biobank study has  
353 ethical approval from the National Information Governance Board for Health and Social Care and  
354 Northwest Multicenter Research Ethics Committee (11/NW/0382).

355 **Consent to participate**

356 UK Biobank obtained informed consent from all participants to collect and use linked data for future  
357 research use.



358 **Data availability**

359 This research has been conducted using the UK Biobank Resource under Application Number 89630.

360 The data and analytical code that support the findings of this study are available on application to the

361 UK Biobank (<https://www.ukbiobank.ac.uk/enable-your-research/apply-for-access>).

362

363 **References**

- 364 1. DeSantis CE, Lin CC, Mariotto AB, Siegel RL, Stein KD, Kramer JL, Alteri R,  
365 Robbins AS, Jemal A. Cancer treatment and survivorship statistics, 2014. *CA Cancer J Clin*  
366 2014;64:252-71.
- 367 2. Kurman RJ, Shih Ie M. The origin and pathogenesis of epithelial ovarian cancer: a  
368 proposed unifying theory. *Am J Surg Pathol* 2010;34:433-43.
- 369 3. Sankaranarayanan R, Ferlay J. Worldwide burden of gynaecological cancer: the  
370 size of the problem. *Best practice & research. Clinical obstetrics & gynaecology*  
371 2006;20:207-25.
- 372 4. Perets R, Wyant GA, Muto KW, Bijron JG, Poole BB, Chin KT, Chen JY, Ohman  
373 AW, Stepule CD, Kwak S, Karst AM, Hirsch MS, et al. Transformation of the fallopian tube  
374 secretory epithelium leads to high-grade serous ovarian cancer in Brca;Tp53;Pten models.  
375 *Cancer Cell* 2013;24:751-65.
- 376 5. Lheureux S, Gourley C, Vergote I, Oza AM. Epithelial ovarian cancer. *The Lancet*  
377 2019;393:1240-53.
- 378 6. Zhang S, Cheng C, Lin Z, Xiao L, Su X, Zheng L, Mu Y, Liao M, Ouyang R, Li  
379 W, Ma J, Cai J, et al. The global burden and associated factors of ovarian cancer in 1990-  
380 2019: findings from the Global Burden of Disease Study 2019. *BMC public health*  
381 2022;22:1455.
- 382 7. Jiao YS, Gong TT, Wang YL, Wu QJ. Comorbidity and survival among women  
383 with ovarian cancer: evidence from prospective studies. *Scientific reports* 2015;5:11720.
- 384 8. Lee L, Cheung WY, Atkinson E, Krzyzanowska MK. Impact of comorbidity on  
385 chemotherapy use and outcomes in solid tumors: a systematic review. *Journal of clinical*  
386 *oncology : official journal of the American Society of Clinical Oncology* 2011;29:106-17.
- 387 9. Bush WS, Oetjens MT, Crawford DC. Unravelling the human genome-phenome  
388 relationship using phenome-wide association studies. *Nature Reviews Genetics* 2016;17:129-  
389 45.
- 390 10. Davies NM, Holmes MV, Davey Smith G. Reading Mendelian randomisation  
391 studies: a guide, glossary, and checklist for clinicians. *BMJ* 2018;362:k601.
- 392 11. Sudlow C, Gallacher J, Allen N, Beral V, Burton P, Danesh J, Downey P, Elliott  
393 P, Green J, Landray M, Liu B, Matthews P, et al. UK Biobank: an open access resource for  
394 identifying the causes of a wide range of complex diseases of middle and old age. *PLOS*  
395 *Medicine* 2015;12:e1001779.
- 396 12. Wei WQ, Bastarache LA, Carroll RJ, Marlo JE, Osterman TJ, Gamazon ER, Cox  
397 NJ, Roden DM, Denny JC. Evaluating phecodes, clinical classification software, and ICD-9-  
398 CM codes for phenome-wide association studies in the electronic health record. *PLoS One*  
399 2017;12:e0175508.
- 400 13. King C, Mulugeta A, Nabi F, Walton R, Zhou A, Hyppönen E. Mendelian  
401 randomization case-control PheWAS in UK Biobank shows evidence of causality for  
402 smoking intensity in 28 distinct clinical conditions. *EClinicalMedicine* 2020;26:100488.
- 403 14. Verma A, Bradford Y, Dudek S, Lucas AM, Verma SS, Pendergrass SA, Ritchie  
404 MD. A simulation study investigating power estimates in phenome-wide association studies.  
405 *BMC bioinformatics* 2018;19:120.
- 406 15. Phelan CM, Kuchenbaecker KB, Tyrer JP, Kar SP, Lawrenson K, Winham SJ,  
407 Dennis J, Pirie A, Riggan MJ, Chornokur G, Earp MA, Lyra PC, Jr., et al. Identification of 12  
408 new susceptibility loci for different histotypes of epithelial ovarian cancer. *Nat Genet*  
409 2017;49:680-91.

- 410 16. Song H, Ramus SJ, Tyrer J, Bolton KL, Gentry-Maharaj A, Wozniak E, Anton-  
411 Culver H, Chang-Claude J, Cramer DW, DiCioccio R, Dörk T, Goode EL, et al. A genome-  
412 wide association study identifies a new ovarian cancer susceptibility locus on 9p22.2. *Nat*  
413 *Genet* 2009;41:996-1000.
- 414 17. Goode EL, Chenevix-Trench G, Song H, Ramus SJ, Notaridou M, Lawrenson K,  
415 Widschwendter M, Vierkant RA, Larson MC, Kjaer SK, Birrer MJ, Berchuck A, et al. A  
416 genome-wide association study identifies susceptibility loci for ovarian cancer at 2q31 and  
417 8q24. *Nat Genet* 2010;42:874-9.
- 418 18. Bolton KL, Tyrer J, Song H, Ramus SJ, Notaridou M, Jones C, Sher T, Gentry-  
419 Maharaj A, Wozniak E, Tsai YY, Weidhaas J, Paik D, et al. Common variants at 19p13 are  
420 associated with susceptibility to ovarian cancer. *Nat Genet* 2010;42:880-4.
- 421 19. Rafnar T, Gudbjartsson DF, Sulem P, Jonasdottir A, Sigurdsson A, Jonasdottir A,  
422 Besenbacher S, Lundin P, Stacey SN, Gudmundsson J, Magnusson OT, le Roux L, et al.  
423 Mutations in BRIP1 confer high risk of ovarian cancer. *Nat Genet* 2011;43:1104-7.
- 424 20. Couch FJ, Wang X, McGuffog L, Lee A, Olswold C, Kuchenbaecker KB, Soucy  
425 P, Fredericksen Z, Barrowdale D, Dennis J, Gaudet MM, Dicks E, et al. Genome-wide  
426 association study in BRCA1 mutation carriers identifies novel loci associated with breast and  
427 ovarian cancer risk. *PLoS genetics* 2013;9:e1003212.
- 428 21. Pharoah PD, Tsai YY, Ramus SJ, Phelan CM, Goode EL, Lawrenson K, Buckley  
429 M, Fridley BL, Tyrer JP, Shen H, Weber R, Karevan R, et al. GWAS meta-analysis and  
430 replication identifies three new susceptibility loci for ovarian cancer. *Nat Genet* 2013;45:362-  
431 70, 70e1-2.
- 432 22. Kuchenbaecker KB, Ramus SJ, Tyrer J, Lee A, Shen HC, Beesley J, Lawrenson  
433 K, McGuffog L, Healey S, Lee JM, Spindler TJ, Lin YG, et al. Identification of six new  
434 susceptibility loci for invasive epithelial ovarian cancer. *Nat Genet* 2015;47:164-71.
- 435 23. Kelemen LE, Lawrenson K, Tyrer J, Li Q, Lee JM, Seo JH, Phelan CM, Beesley  
436 J, Chen X, Spindler TJ, Aben KK, Anton-Culver H, et al. Genome-wide significant risk  
437 associations for mucinous ovarian carcinoma. *Nat Genet* 2015;47:888-97.
- 438 24. Bycroft C, Freeman C, Petkova D, Band G, Elliott LT, Sharp K, Motyer A,  
439 Vukcevic D, Delaneau O, O'Connell J, Cortes A, Welsh S, et al. The UK Biobank resource  
440 with deep phenotyping and genomic data. *Nature* 2018;562:203-09.
- 441 25. Carroll RJ, Bastarache L, Denny JC. R PheWAS: data analysis and plotting tools  
442 for phenome-wide association studies in the R environment. *Bioinformatics* 2014;30:2375-  
443 76.
- 444 26. Bowden J, Del Greco MF, Minelli C, Davey Smith G, Sheehan N, Thompson J. A  
445 framework for the investigation of pleiotropy in two-sample summary data Mendelian  
446 randomization. *Stat Med* 2017;36:1783-802.
- 447 27. Bowden J, Davey Smith G, Haycock PC, Burgess S. Consistent estimation in  
448 mendelian randomization with some invalid instruments using a weighted median estimator.  
449 *Genet Epidemiol* 2016;40:304-14.
- 450 28. Hartwig FP, Davey Smith G, Bowden J. Robust inference in summary data  
451 Mendelian randomization via the zero modal pleiotropy assumption. *Int J Epidemiol*  
452 2017;46:1985-98.
- 453 29. Verbanck M, Chen CY, Neale B, Do R. Detection of widespread horizontal  
454 pleiotropy in causal relationships inferred from Mendelian randomization between complex  
455 traits and diseases. *Nat Genet* 2018;50:693-98.
- 456 30. Bowden J, Del Greco MF, Minelli C, Davey Smith G, Sheehan NA, Thompson  
457 JR. Assessing the suitability of summary data for two-sample Mendelian randomization  
458 analyses using MR-Egger regression: the role of the I2 statistic. *Int J Epidemiol*  
459 2016;45:1961-74.

460 31. Foley CN, Staley JR, Breen PG, Sun BB, Kirk PDW, Burgess S, Howson JMM. A  
461 fast and efficient colocalization algorithm for identifying shared genetic risk factors across  
462 multiple traits. *Nature communications* 2021;12:764.

463 32. Chang CC, Chow CC, Tellier LC, Vattikuti S, Purcell SM, Lee JJ. Second-  
464 generation PLINK: rising to the challenge of larger and richer datasets. *Gigascience* 2015;4:7.

465 33. Parsons SL, Lang MW, Steele RJC. Malignant ascites: a 2-year review from a  
466 teaching hospital. *European Journal of Surgical Oncology (EJSO)* 1996;22:237-39.

467 34. Ayantunde AA, Parsons SL. Pattern and prognostic factors in patients with  
468 malignant ascites: a retrospective study. *Annals of Oncology* 2007;18:945-49.

469 35. Kipps E, Tan DS, Kaye SB. Meeting the challenge of ascites in ovarian cancer:  
470 new avenues for therapy and research. *Nat Rev Cancer* 2013;13:273-82.

471 36. Ahmed N, Stenvers KL. Getting to know ovarian cancer ascites: opportunities for  
472 targeted therapy-based translational research. *Front Oncol* 2013;3:256.

473 37. Porcel JM, Diaz JP, Chi DS. Clinical implications of pleural effusions in ovarian  
474 cancer. *Respirology* 2012;17:1060-7.

475 38. Xu M, Zhang W, Gao C, Zhou Y, Xie Y. Postoperative pulmonary complications  
476 and outcomes in cytoreductive surgery for ovarian cancer: a propensity-matched analysis.  
477 *BMC anesthesiology* 2022;22:120.

478 39. Buckingham EM, Klingelhutz AJ. The role of telomeres in the ageing of human  
479 skin. *Experimental Dermatology* 2011;20:297-302.

480 40. Chen B, Yan Y, Wang H, Xu J. Association between genetically determined  
481 telomere length and health-related outcomes: A systematic review and meta-analysis of  
482 Mendelian randomization studies. *Aging Cell* 2023;22:e13874.

483 41. Pomel C, Jeyarajah A, Oram D, Shepherd J, Milliken D, Dauplat J, Reynolds K.  
484 Cytoreductive surgery in ovarian cancer. *Cancer Imaging* 2007;7:210-5.

485 42. Cubillos-Ruiz Juan R, Silberman Pedro C, Rutkowski Melanie R, Chopra S,  
486 Perales-Puchalt A, Song M, Zhang S, Bettigole Sarah E, Gupta D, Holcomb K, Ellenson  
487 Lora H, Caputo T, et al. ER Stress Sensor XBP1 Controls Anti-tumor Immunity by  
488 Disrupting Dendritic Cell Homeostasis. *Cell* 2015;161:1527-38.

489 43. Mortlock S, Corona RI, Kho PF, Pharoah P, Seo JH, Freedman ML, Gayther SA,  
490 Siedhoff MT, Rogers PAW, Leuchter R, Walsh CS, Cass I, et al. A multi-level investigation  
491 of the genetic relationship between endometriosis and ovarian cancer histotypes. *Cell Rep*  
492 *Med* 2022;3:100542.

493 44. Gallagher CS, Mäkinen N, Harris HR, Rahmioglu N, Uimari O, Cook JP, Shigesi  
494 N, Ferreira T, Velez-Edwards DR, Edwards TL, Mortlock S, Ruhioğlu Z, et al. Genome-wide  
495 association and epidemiological analyses reveal common genetic origins between uterine  
496 leiomyomata and endometriosis. *Nature communications* 2019;10:4857.

497 45. Schunkert H, König IR, Kathiresan S, Reilly MP, Assimes TL, Holm H, Preuss  
498 M, Stewart AF, Barbalic M, Gieger C, Absher D, Aherrahrou Z, et al. Large-scale association  
499 analysis identifies 13 new susceptibility loci for coronary artery disease. *Nat Genet*  
500 2011;43:333-8.

501 46. Lindström S, Brody JA, Turman C, Germain M, Bartz TM, Smith EN, Chen MH,  
502 Puurunen M, Chasman D, Hassler J, Pankratz N, Basu S, et al. A large-scale exome array  
503 analysis of venous thromboembolism. *Genet Epidemiol* 2019;43:449-57.

504 47. Klarin D, Busenkell E, Judy R, Lynch J, Levin M, Haessler J, Aragam K, Chaffin  
505 M, Haas M, Lindström S, Assimes TL, Huang J, et al. Genome-wide association analysis of  
506 venous thromboembolism identifies new risk loci and genetic overlap with arterial vascular  
507 disease. *Nat Genet* 2019;51:1574-79.

508 48. Shah S, Henry A, Roselli C, Lin H, Sveinbjörnsson G, Fatemifar G, Hedman Å K,  
509 Wilk JB, Morley MP, Chaffin MD, Helgadottir A, Verweij N, et al. Genome-wide

510 association and Mendelian randomisation analysis provide insights into the pathogenesis of  
511 heart failure. *Nature communications* 2020;11:163.

512 49. Sakaue S, Kanai M, Tanigawa Y, Karjalainen J, Kurki M, Koshiha S, Narita A,  
513 Konuma T, Yamamoto K, Akiyama M, Ishigaki K, Suzuki A, et al. A cross-population atlas  
514 of genetic associations for 220 human phenotypes. *Nat Genet* 2021;53:1415-24.

515 50. Klarin D, Damrauer SM, Cho K, Sun YV, Teslovich TM, Honerlaw J, Gagnon  
516 DR, DuVall SL, Li J, Peloso GM, Chaffin M, Small AM, et al. Genetics of blood lipids  
517 among ~300,000 multi-ethnic participants of the Million Veteran Program. *Nat Genet*  
518 2018;50:1514-23.

519 51. Sinnott-Armstrong N, Tanigawa Y, Amar D, Mars N, Benner C, Aguirre M,  
520 Venkataraman GR, Wainberg M, Ollila HM, Kiiskinen T, Havulinna AS, Pirruccello JP, et  
521 al. Genetics of 35 blood and urine biomarkers in the UK Biobank. *Nat Genet* 2021;53:185-  
522 94.

523 52. Dev S, Babitt JL. Overview of iron metabolism in health and disease.  
524 *Hemodialysis international. International Symposium on Home Hemodialysis* 2017;21 Suppl  
525 1:S6-s20.

526 53. Rafnar T, Gunnarsson B, Stefansson OA, Sulem P, Ingason A, Frigge ML,  
527 Stefansdottir L, Sigurdsson JK, Tragante V, Steinthorsdottir V, Styrkarsdottir U, Stacey SN,  
528 et al. Variants associating with uterine leiomyoma highlight genetic background shared by  
529 various cancers and hormone-related traits. *Nature communications* 2018;9:3636.

530 54. Schumacher FR, Al Olama AA, Berndt SI, Benlloch S, Ahmed M, Saunders EJ,  
531 Dadaev T, Leongamornlert D, Anokian E, Cieza-Borrella C, Goh C, Brook MN, et al.  
532 Association analyses of more than 140,000 men identify 63 new prostate cancer susceptibility  
533 loci. *Nat Genet* 2018;50:928-36.

534 55. Pendergrass SA, Brown-Gentry K, Dudek SM, Torstenson ES, Ambite JL, Avery  
535 CL, Buyske S, Cai C, Fesinmeyer MD, Haiman C, Heiss G, Hindorff LA, et al. The use of  
536 phenome-wide association studies (PheWAS) for exploration of novel genotype-phenotype  
537 relationships and pleiotropy discovery. *Genet Epidemiol* 2011;35:410-22.

538 56. Bowden J, Davey Smith G, Burgess S. Mendelian randomization with invalid  
539 instruments: effect estimation and bias detection through Egger regression. *Int J Epidemiol*  
540 2015;44:512-25.

541 57. Fry A, Littlejohns TJ, Sudlow C, Doherty N, Adamska L, Sprosen T, Collins R,  
542 Allen NE. Comparison of sociodemographic and health-related characteristics of UK  
543 Biobank participants with those of the general population. *Am J Epidemiol* 2017;186:1026-  
544 34.

545 58. Gkatzionis A, Burgess S. Contextualizing selection bias in Mendelian  
546 randomization: how bad is it likely to be? *Int J Epidemiol* 2019;48:691-701.

547

548

549 **Figure legends**

550 **Figure 1.** Manhattan plot showing the phenome-wide association of genetic risk scores of overall  
551 (Panel A) and subtypes (Panel B) of ovarian cancer with wide ranges of diseases. Panel C summaries  
552 the association of the top 15 signals identified at FDR threshold ( $p = 0.0005$ ) in Panel A or Panel B  
553 across the different genetic risk scores. The association for the first three diseases (in blue) is a  
554 validation of the genetic risk scores. Green highlights indicate association that passed the FDR  
555 threshold.

556 **Figure 2.** Mendelian randomisation causal estimates between ovarian cancer subtypes and selected  
557 diseases outcomes. Estimates were from Inverse variance weighted methods. #SNPs are number of  
558 genetic variants included in the analyses.

559 **Figure 3.** Phenome-wide association findings of ovarian cancer risk-increasing variants, with the  
560 Manhattan plot showing selected variants associations across all the diseases outcomes (with the y-  
561 axis showing the level of significance in  $-\log_{10}$  scale), and the forest plot showing the selected variant  
562 – disease associations estimate among women and men.

563 **Figure 4.** Colocalisation analysis of ovarian cancer with dermatological condition at the *TERT* locus.  
564 Panel A. Stacked regional association plots of ovarian cancer and seborrheic keratosis. Panel B.  
565 Portions of the Posterior probability for full colocalisation (PPFC) explained by each genetic variant  
566 at the *TERT* locus. The  $r^2$  colour legends reflect the  $r^2$  of each variant with respect to the lead variant.

567

568 **Tables**569 **Table 1.** Prevalence of ovarian cancer by population characteristics

|                          |                     | All, n (%)     | Ovarian cancer,<br>n(%) | p                       |
|--------------------------|---------------------|----------------|-------------------------|-------------------------|
| All                      |                     | 181,203        | 1,863 (1.3)             |                         |
| Age (in years)           | 39–49               | 40,116 (22.2)  | 231 (0.6)               | 1.1 x 10 <sup>-51</sup> |
|                          | 50–59               | 62,041 (34.2)  | 556 (0.9)               |                         |
|                          | 60–73               | 79,046 (43.6)  | 1,076 (1.4)             |                         |
| Education                | None                | 31,059 (17.1)  | 421 (1.4)               | 0.06                    |
|                          | NVQ/CSE/A-levels    | 83,890 (46.3)  | 819 (1.0)               |                         |
|                          | Degree/professional | 64,785 (35.8)  | 607 (0.9)               |                         |
|                          | Missing             | 1,469 (0.8)    | 16 (1.1)                |                         |
| BMI (kg/m <sup>2</sup> ) | < 18.5              | 1,324 (0.7)    | 10 (0.8)                | 0.005                   |
|                          | 18.5 - <25          | 70,988 (39.2)  | 643 (0.9)               |                         |
|                          | 25 - <30            | 66,596 (36.8)  | 713 (1.1)               |                         |
|                          | ≥ 30                | 41,746 (23.0)  | 489 (1.2)               |                         |
|                          | Missing             | 549 (0.3)      | 9 (1.5)                 |                         |
| Alcohol consumption      | Never               | 7,808 (4.3)    | 109 (1.4)               | 0.03                    |
|                          | Previous            | 6,526 (3.6)    | 64 (1.0)                |                         |
|                          | Current             | 166,747 (92.0) | 1,690 (1.0)             |                         |
|                          | Missing             | 122 (0.1)      | 0 (0.0)                 |                         |
| General health           | Excellent           | 31,630 (17.5)  | 286 (0.9)               | 1.0 × 10 <sup>-16</sup> |
|                          | Good                | 109,012 (60.2) | 1,041 (1.0)             |                         |
|                          | Fair                | 33,519 (18.5)  | 405 (1.2)               |                         |
|                          | Poor                | 6,431 (3.5)    | 112 (1.7)               |                         |
|                          | Missing             | 611 (0.3)      | 19 (3.1)                |                         |

570 p is p-value generated from likelihood ratio test in logistic models adjusted for age, birth  
571 location and assessment centers. BMI: body mass index.

572

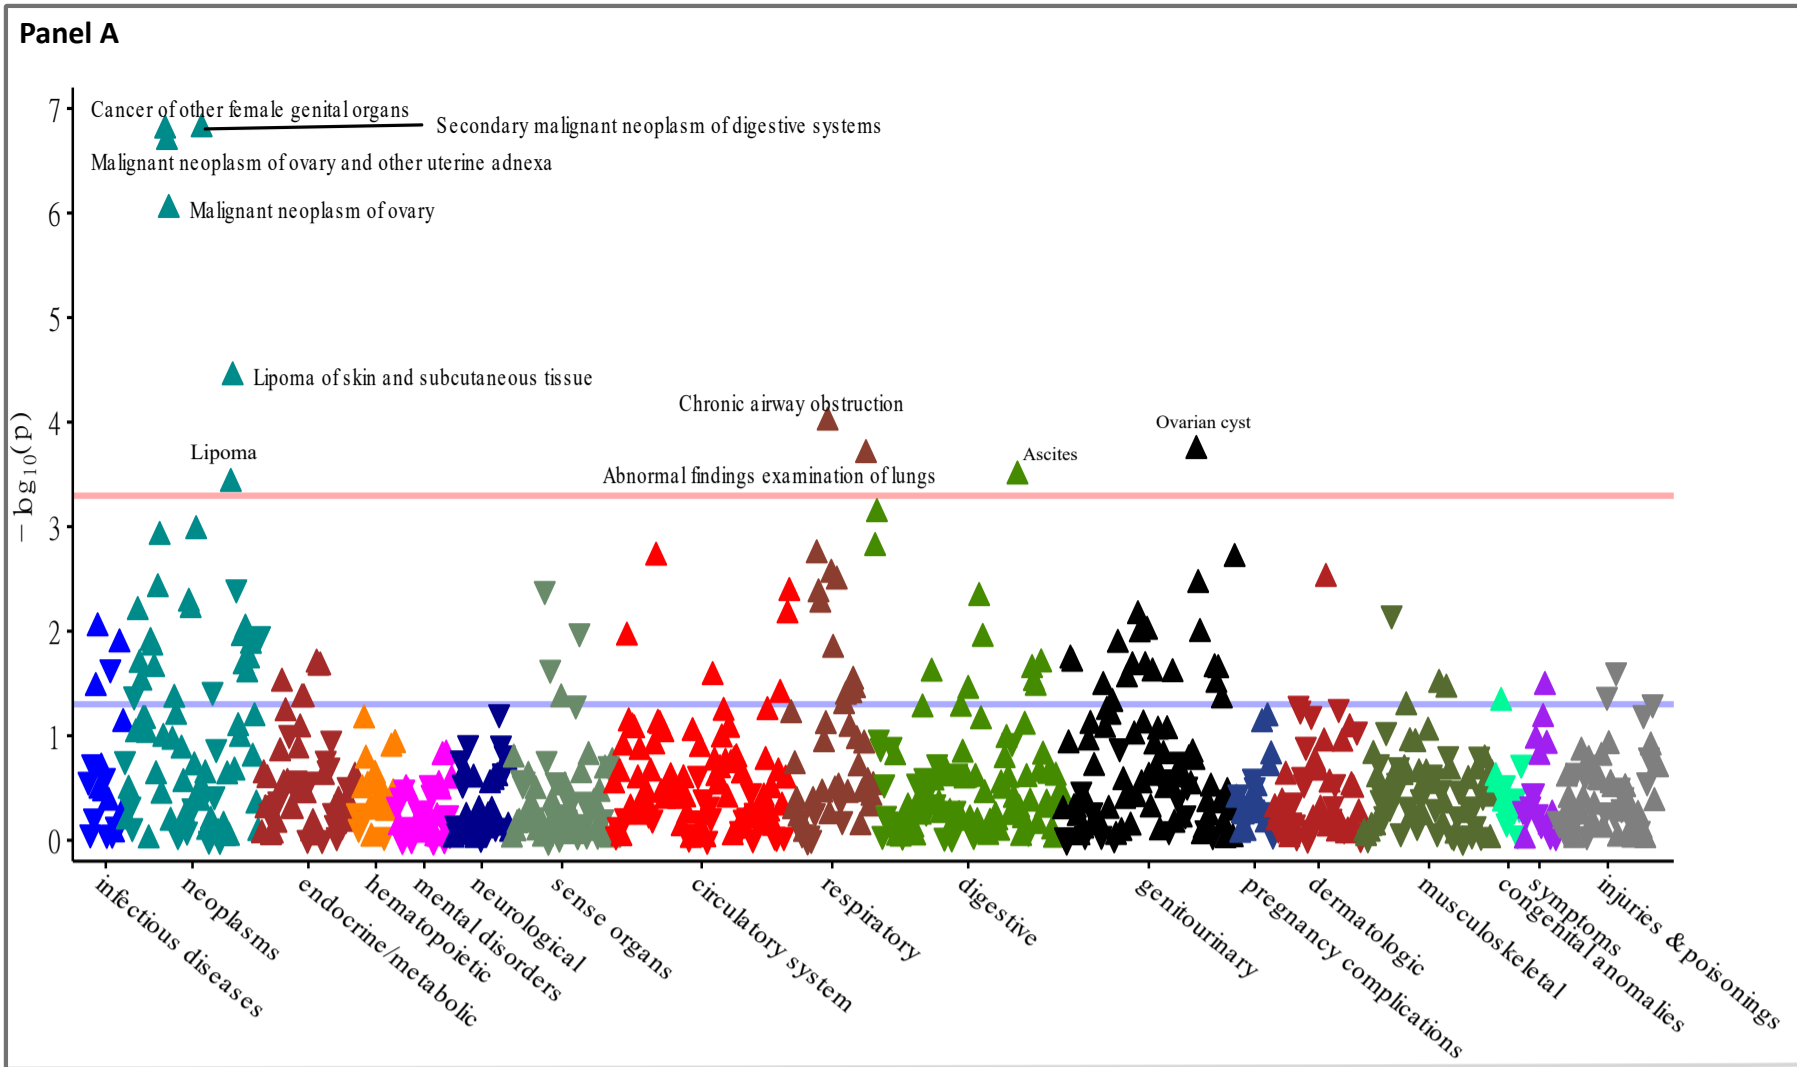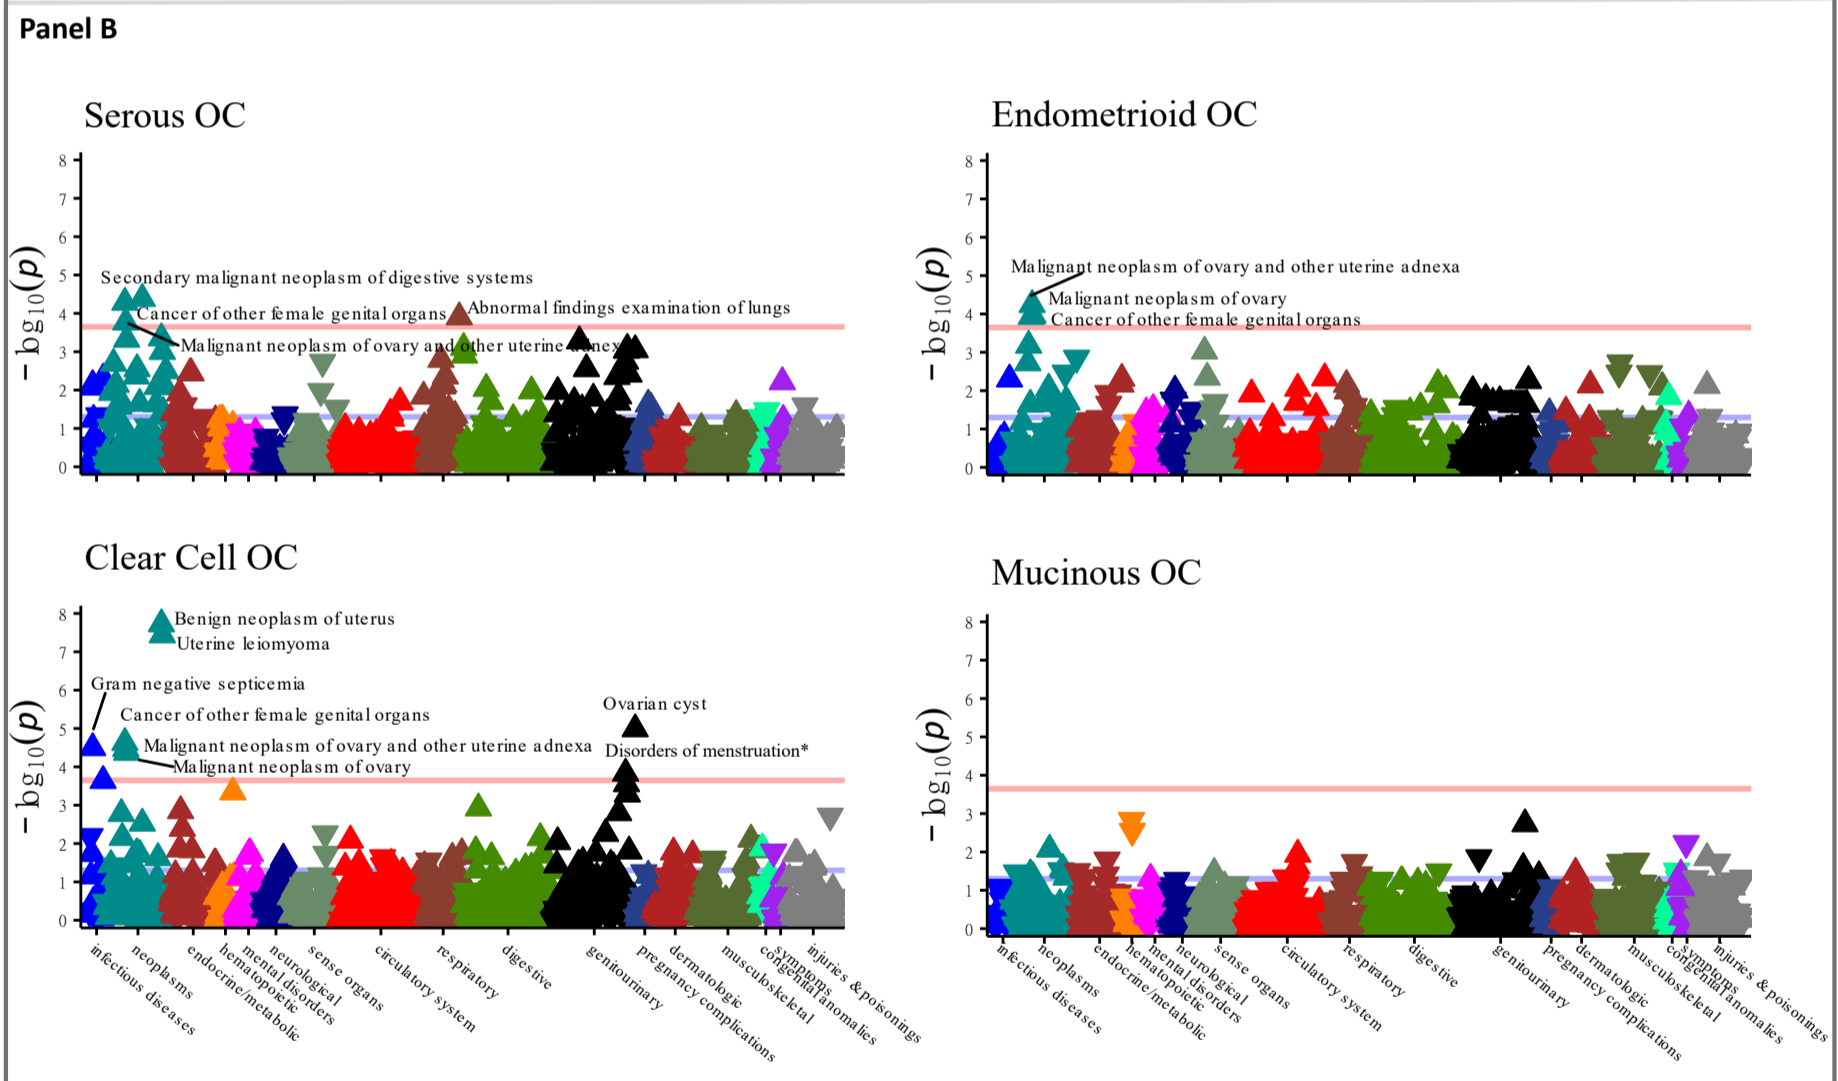

### Panel C

| Disease outcome (Phecode)                                    | Cases,n | Controls,n | OC      |             |                   |                 |               |
|--------------------------------------------------------------|---------|------------|---------|-------------|-------------------|-----------------|---------------|
|                                                              |         |            | P       | Serous OC P | Endometrioid OC P | Clear cell OC P | Mucinous OC P |
| Cancer of other female genital organs (184)                  | 2388    | 122255     | 4.4E-07 | 5.2E-05     | 1.2E-04           | 2.3E-05         | 0.04          |
| Malignant neoplasm of ovary and other uterine adnexa (184.1) | 2091    | 122255     | 2.2E-07 | 1.7E-04     | 5.8E-05           | 3.4E-05         | 0.05          |
| Malignant neoplasm of ovary (184.11)                         | 2072    | 122255     | 1.0E-06 | 4.8E-04     | 1.1E-04           | 4.3E-05         | 0.04          |
| Secondary malignant neoplasm of digestive systems (198.3)    | 1084    | 122255     | 2.0E-06 | 4.1E-05     | 0.009             | 0.003           | 0.69          |
| Ascites (572)                                                | 845     | 104686     | 3.2E-04 | 0.01        | 0.007             | 0.04            | 0.66          |
| Chronic airway obstruction (496)                             | 5229    | 146930     | 1.0E-04 | 0.002       | 0.01              | 0.09            | 0.86          |
| Abnormal findings examination of lungs (514)                 | 1193    | 146930     | 6.9E-05 | 1.2E-04     | 0.12              | 0.07            | 0.68          |
| Postoperative infection (80)                                 | 2153    | 164159     | 0.002   | 0.005       | 0.005             | 2.3E-04         | 0.78          |
| Gram negative septicemia (38.1)                              | 385     | 164159     | 0.007   | 0.007       | 0.52              | 3.2E-05         | 0.81          |
| Benign neoplasm of uterus (218)                              | 9234    | 122255     | 0.002   | 4.4E-04     | 0.60              | 1.9E-08         | 0.72          |
| Uterine leiomyoma (218.1)                                    | 9008    | 122255     | 0.007   | 0.001       | 0.66              | 3.7E-08         | 0.93          |
| Disorders of menstruation* (626)                             | 15578   | 116934     | 0.03    | 0.002       | 0.22              | 1.5E-04         | 0.30          |
| Ovarian cyst (628)                                           | 4147    | 116934     | 6.0E-05 | 8.9E-04     | 0.39              | 1.0E-05         | 0.92          |
| Lipoma (214)                                                 | 2636    | 122255     | 3.9E-04 | 0.02        | 0.04              | 0.12            | 0.03          |
| Lipoma of skin and subcutaneous tissue (214.1)               | 2171    | 122255     | 3.7E-05 | 0.008       | 0.09              | 0.08            | 0.03          |



**Secondary malignant neoplasm of digestive systems**

|                     |    |                   |
|---------------------|----|-------------------|
| Ovarian cancer (OC) | 31 | 1.64 (1.33, 2.02) |
| Serous OC           | 20 | 1.34 (1.17, 1.55) |
| Endometrioid OC     | 5  | 1.82 (1.18, 2.81) |
| Clear Cell OC       | 5  | 1.55 (1.16, 2.06) |
| Mucinous OC         | 8  | 1.02 (0.82, 1.27) |

**Ascites**

|                     |    |                   |
|---------------------|----|-------------------|
| Ovarian cancer (OC) | 31 | 1.48 (1.17, 1.86) |
| Serous OC           | 20 | 1.24 (1.07, 1.45) |
| Endometrioid OC     | 5  | 1.99 (1.06, 3.74) |
| Clear Cell OC       | 5  | 1.40 (1.01, 1.94) |
| Mucinous OC         | 8  | 1.04 (0.85, 1.26) |

**Chronic airway obstruction**

|                     |    |                   |
|---------------------|----|-------------------|
| Ovarian cancer (OC) | 31 | 1.17 (1.07, 1.29) |
| Serous OC           | 20 | 1.10 (1.03, 1.17) |
| Endometrioid OC     | 5  | 1.29 (1.04, 1.59) |
| Clear Cell OC       | 5  | 1.12 (0.97, 1.29) |
| Mucinous OC         | 8  | 1.01 (0.94, 1.08) |

**Abnormal findings examination of lungs**

|                     |    |                   |
|---------------------|----|-------------------|
| Ovarian cancer (OC) | 31 | 1.51 (1.22, 1.87) |
| Serous OC           | 20 | 1.28 (1.09, 1.51) |
| Endometrioid OC     | 5  | 1.43 (0.85, 2.43) |
| Clear Cell OC       | 5  | 1.29 (0.95, 1.74) |
| Mucinous OC         | 8  | 0.98 (0.84, 1.13) |

**Ovarian cyst**

|                     |    |                   |
|---------------------|----|-------------------|
| Ovarian cancer (OC) | 31 | 1.23 (1.04, 1.46) |
| Serous OC           | 20 | 1.11 (0.99, 1.25) |
| Endometrioid OC     | 5  | 1.11 (0.79, 1.55) |
| Clear Cell OC       | 5  | 1.39 (1.08, 1.79) |
| Mucinous OC         | 8  | 0.99 (0.83, 1.18) |

**Lipoma**

|                     |    |                   |
|---------------------|----|-------------------|
| Ovarian cancer (OC) | 31 | 1.24 (1.02, 1.52) |
| Serous OC           | 20 | 1.13 (0.98, 1.30) |
| Endometrioid OC     | 5  | 1.39 (0.89, 2.16) |
| Clear Cell OC       | 5  | 1.16 (0.90, 1.49) |
| Mucinous OC         | 8  | 1.14 (1.02, 1.27) |

**Lipoma of skin and subcutaneous tissue**

|                     |    |                   |
|---------------------|----|-------------------|
| Ovarian cancer (OC) | 31 | 1.31 (1.06, 1.61) |
| Serous OC           | 20 | 1.16 (1.00, 1.34) |
| Endometrioid OC     | 5  | 1.34 (0.84, 2.16) |
| Clear Cell OC       | 5  | 1.20 (0.98, 1.47) |
| Mucinous OC         | 8  | 1.15 (1.03, 1.28) |

**Postoperative infection**

|                     |    |                   |
|---------------------|----|-------------------|
| Ovarian cancer (OC) | 31 | 1.28 (1.10, 1.48) |
| Serous OC           | 20 | 1.15 (1.02, 1.29) |
| Endometrioid OC     | 5  | 1.61 (0.93, 2.78) |
| Clear Cell OC       | 5  | 1.47 (1.05, 2.05) |
| Mucinous OC         | 8  | 1.00 (0.89, 1.11) |

**Gram negative septicemia**

|                     |    |                   |
|---------------------|----|-------------------|
| Ovarian cancer (OC) | 31 | 1.55 (1.06, 2.26) |
| Serous OC           | 20 | 1.29 (0.98, 1.69) |
| Endometrioid OC     | 5  | 1.26 (0.80, 2.62) |
| Clear Cell OC       | 5  | 2.74 (1.69, 4.45) |
| Mucinous OC         | 8  | 1.05 (0.80, 1.39) |

**Benign neoplasm of uterus**

|                     |    |                   |
|---------------------|----|-------------------|
| Ovarian cancer (OC) | 31 | 1.13 (0.95, 1.33) |
| Serous OC           | 20 | 1.09 (0.96, 1.25) |
| Endometrioid OC     | 5  | 1.04 (0.66, 1.64) |
| Clear Cell OC       | 5  | 1.34 (1.09, 1.66) |
| Mucinous OC         | 8  | 1.01 (0.93, 1.10) |

**Uterine leiomyoma**

|                     |    |                   |
|---------------------|----|-------------------|
| Ovarian cancer (OC) | 31 | 1.11 (0.94, 1.32) |
| Serous OC           | 20 | 1.09 (0.96, 1.24) |
| Endometrioid OC     | 5  | 1.03 (0.66, 1.63) |
| Clear Cell OC       | 5  | 1.34 (1.08, 1.66) |
| Mucinous OC         | 8  | 1.00 (0.92, 1.09) |

**Disorders of menstruation**

|                     |    |                   |
|---------------------|----|-------------------|
| Ovarian cancer (OC) | 31 | 1.06 (0.97, 1.16) |
| Serous OC           | 20 | 1.06 (0.99, 1.13) |
| Endometrioid OC     | 5  | 1.08 (0.91, 1.29) |
| Clear Cell OC       | 5  | 1.17 (1.05, 1.31) |
| Mucinous OC         | 8  | 1.02 (0.96, 1.09) |

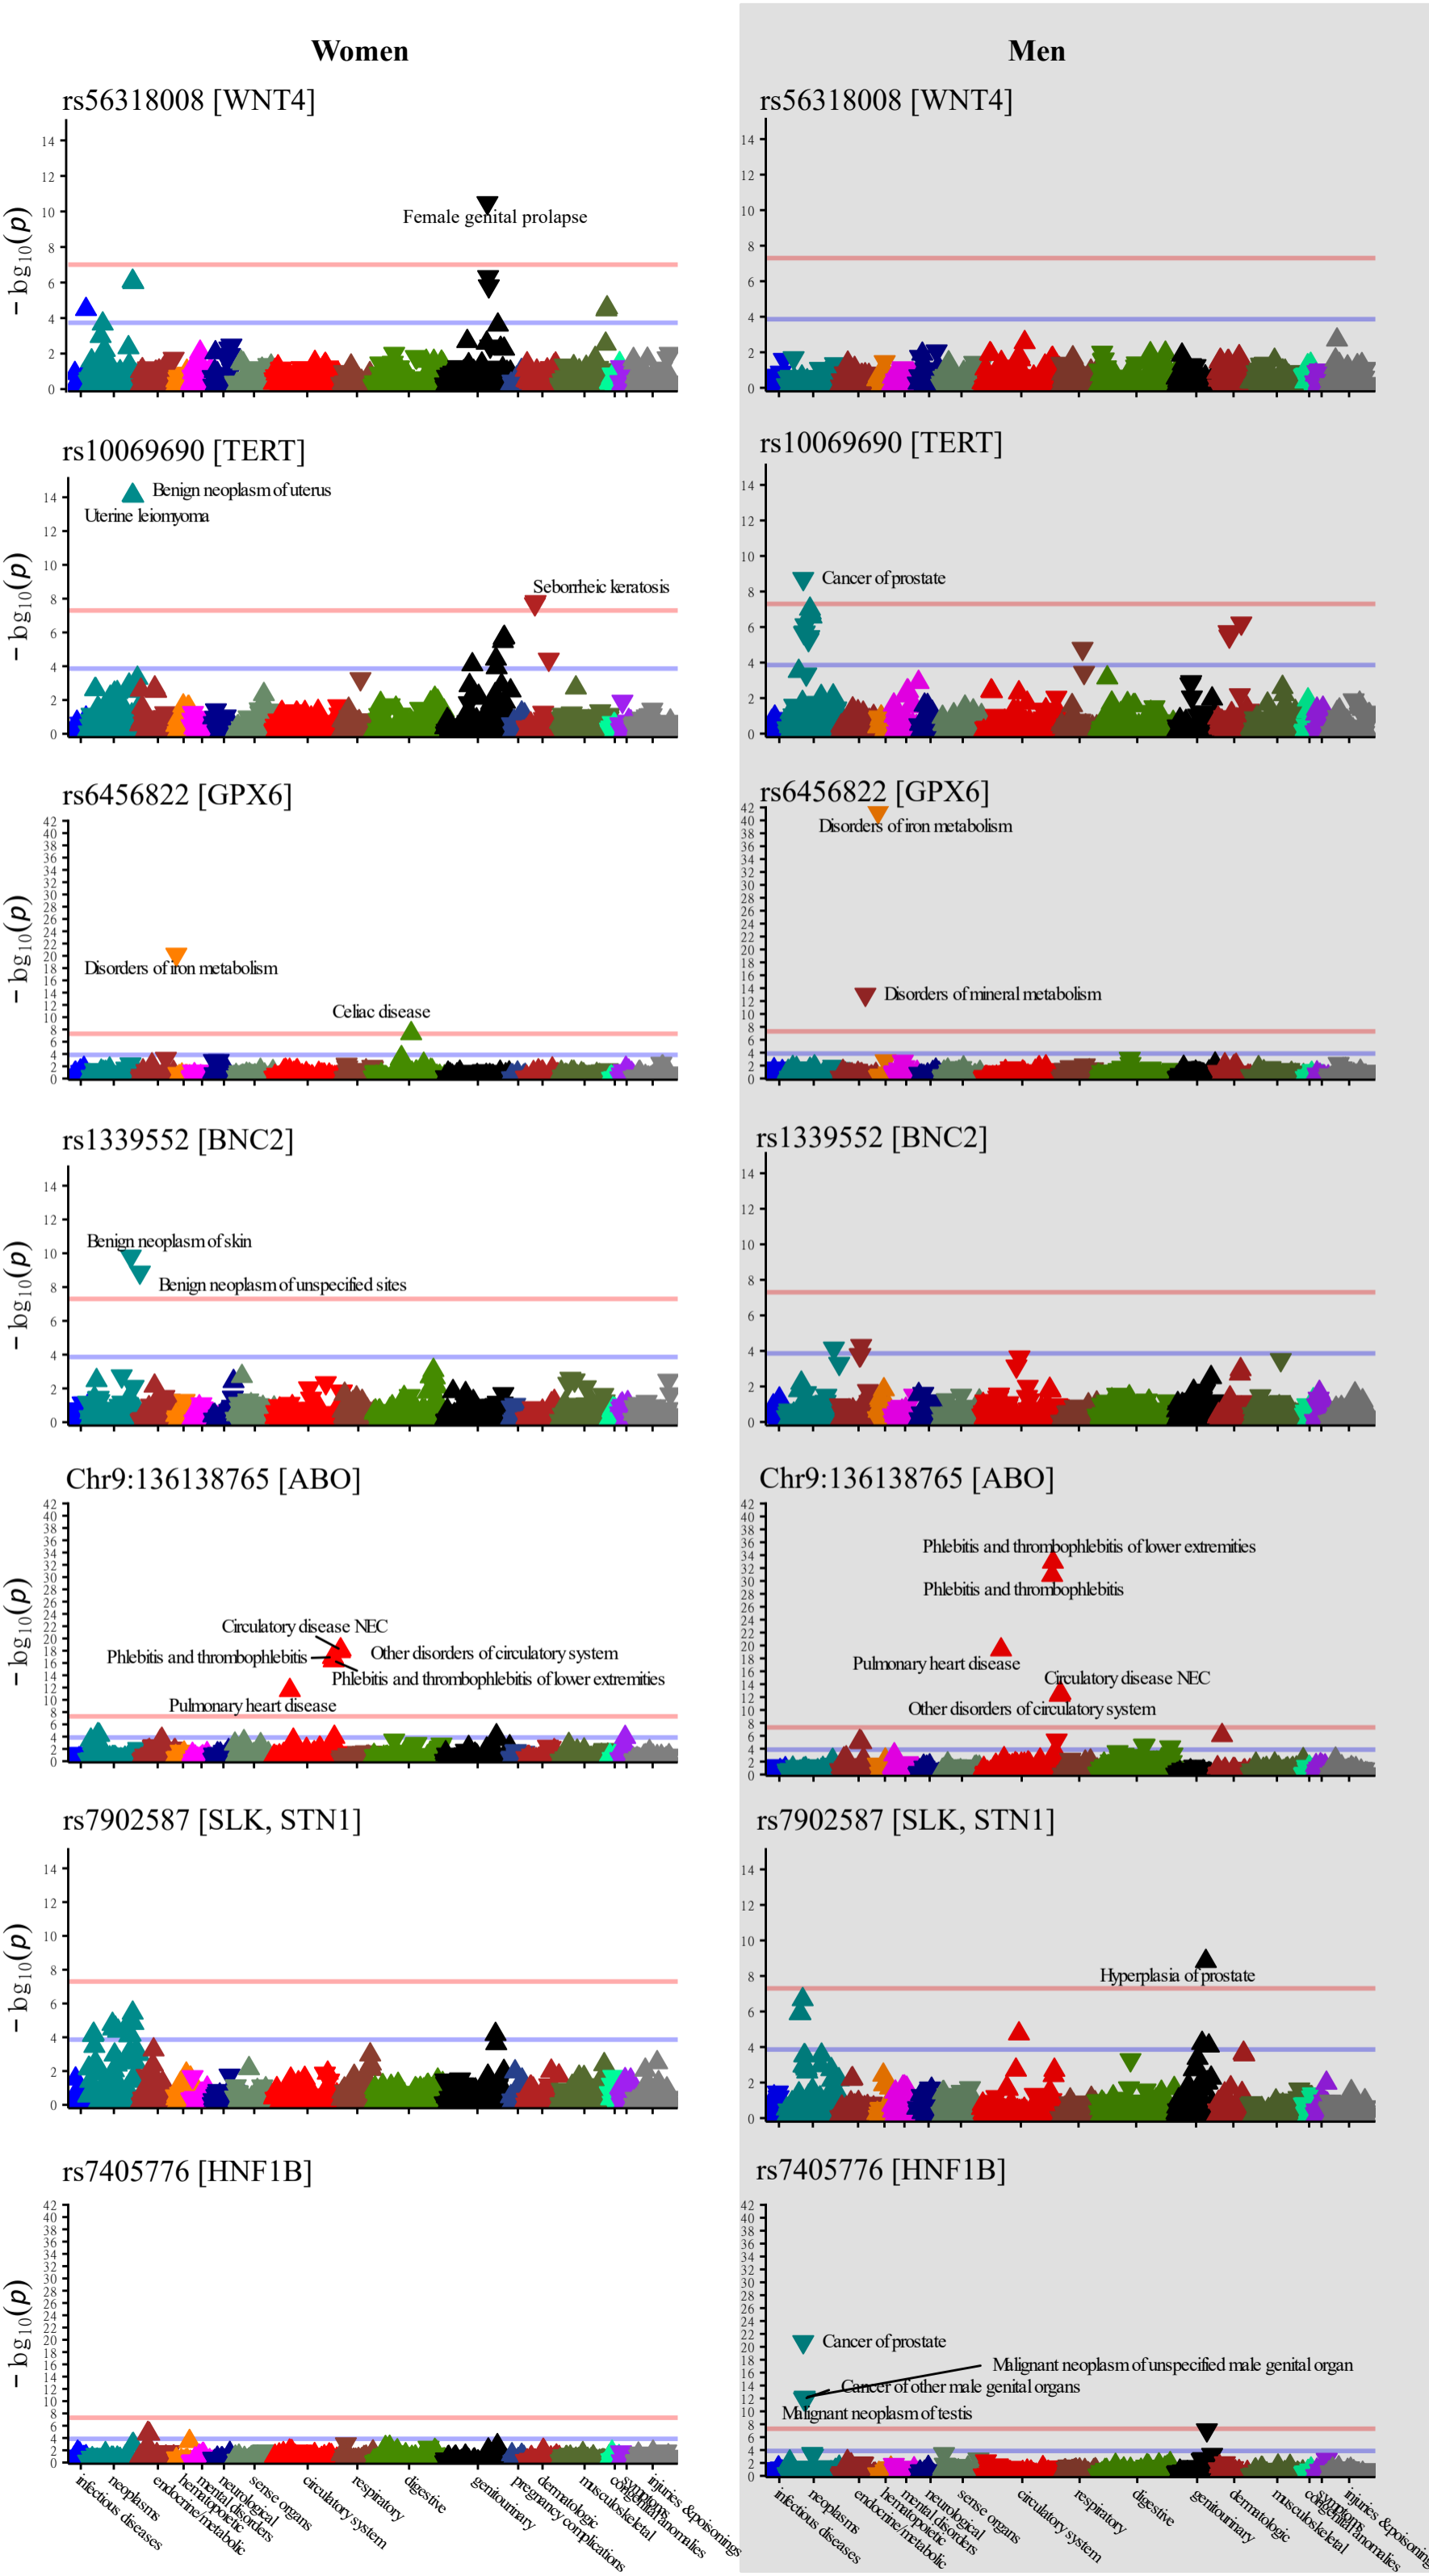

|                                                             | Cases,n     | Controls,n | OR (95% CI)       |
|-------------------------------------------------------------|-------------|------------|-------------------|
| <b>rs56318008 [WNT4]</b>                                    |             |            |                   |
| Female genital prolapse [618]                               | Women 10596 | 115919     | 0.86 (0.83, 0.90) |
| <b>rs10069690 [TERT]</b>                                    |             |            |                   |
| Benign neoplasm of uterus [218]                             | Women 9234  | 122255     | 1.14 (1.10, 1.18) |
| Uterine leiomyoma [218.1]                                   | Women 9008  | 122255     | 1.14 (1.11, 1.18) |
| Cancer of prostate [185]                                    | Men 7073    | 105220     | 0.88 (0.85, 0.92) |
| Erythematous dermatosis [690]                               | Women 1603  | 156040     | 0.78 (0.72, 0.85) |
|                                                             | Men 1439    | 133564     | 0.81 (0.74, 0.88) |
| Seborrheic keratosis [702.2]                                | Women 1584  | 156040     | 0.78 (0.72, 0.85) |
|                                                             | Men 1389    | 133564     | 0.79 (0.72, 0.87) |
| <b>rs6456822 [GPX6]</b>                                     |             |            |                   |
| Disorders of mineral metabolism [275]                       | Women 1110  | 143687     | 0.86 (0.79, 0.94) |
|                                                             | Men 1360    | 117777     | 0.74 (0.69, 0.80) |
| Disorders of iron metabolism [275.1]                        | Women 217   | 165527     | 0.41 (0.34, 0.49) |
|                                                             | Men 444     | 143918     | 0.40 (0.35, 0.45) |
| Celiac disease [557.1]                                      | Women 1139  | 104682     | 1.30 (1.18, 1.42) |
|                                                             | Men 625     | 86330      | 1.10 (0.97, 1.24) |
| <b>rs1339552 [BNC2]</b>                                     |             |            |                   |
| Benign neoplasm of unspecified sites [229]                  | Women 1397  | 119457     | 0.79 (0.73, 0.85) |
|                                                             | Men 674     | 109495     | 0.83 (0.74, 0.92) |
| Benign neoplasm of skin [216]                               | Women 5003  | 119457     | 0.88 (0.84, 0.91) |
|                                                             | Men 2969    | 109495     | 0.90 (0.85, 0.95) |
| <b>Chr9:136138765 [ABO]</b>                                 |             |            |                   |
| Other disorders of circulatory system [459]                 | Women 7598  | 114822     | 1.20 (1.16, 1.25) |
|                                                             | Men 9446    | 86395      | 1.15 (1.11, 1.20) |
| Pulmonary heart disease [415]                               | Women 2199  | 114822     | 1.30 (1.21, 1.40) |
|                                                             | Men 2707    | 86395      | 1.35 (1.27, 1.45) |
| Circulatory disease NEC [459.9]                             | Women 7514  | 114822     | 1.21 (1.16, 1.26) |
|                                                             | Men 9320    | 86395      | 1.16 (1.11, 1.20) |
| Phlebitis and thrombophlebitis of lower extremities [451.2] | Women 1698  | 114822     | 1.42 (1.31, 1.54) |
|                                                             | Men 2196    | 86395      | 1.52 (1.41, 1.63) |
| Phlebitis and thrombophlebitis [451]                        | Women 1535  | 114822     | 1.44 (1.32, 1.56) |
|                                                             | Men 2056    | 86395      | 1.55 (1.45, 1.67) |
| <b>rs7902587 [SLK, STN1]</b>                                |             |            |                   |
| Hyperplasia of prostate [600]                               | Men 11270   | 112440     | 1.15 (1.10, 1.21) |
| <b>rs7405776 [HNF1B]</b>                                    |             |            |                   |
| Cancer of prostate [185]                                    | Men 7073    | 105220     | 0.84 (0.80, 0.87) |
| Cancer of other male genital organs [187]                   | Men 3331    | 111993     | 0.83 (0.78, 0.87) |
| Malignant neoplasm of unspecified* [187.1]                  | Men 3086    | 111993     | 0.82 (0.78, 0.86) |
| Malignant neoplasm of testis [187.2]                        | Men 3195    | 111993     | 0.82 (0.78, 0.87) |

# Ovarian cancer

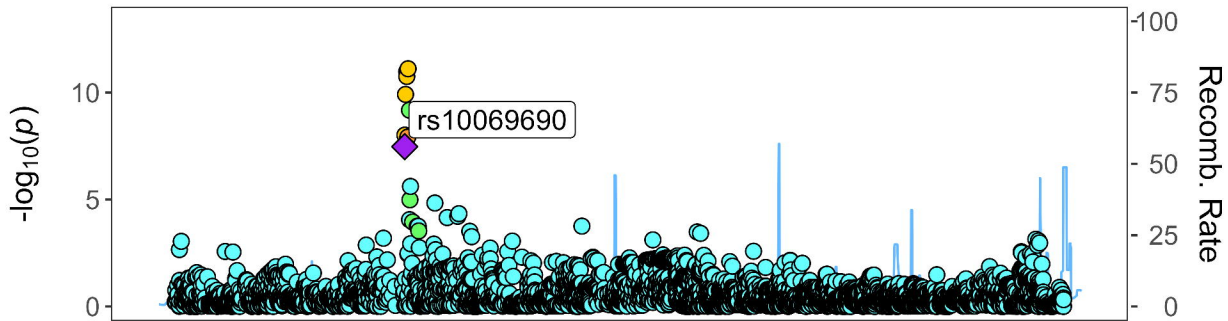

# Seborrheic keratosis

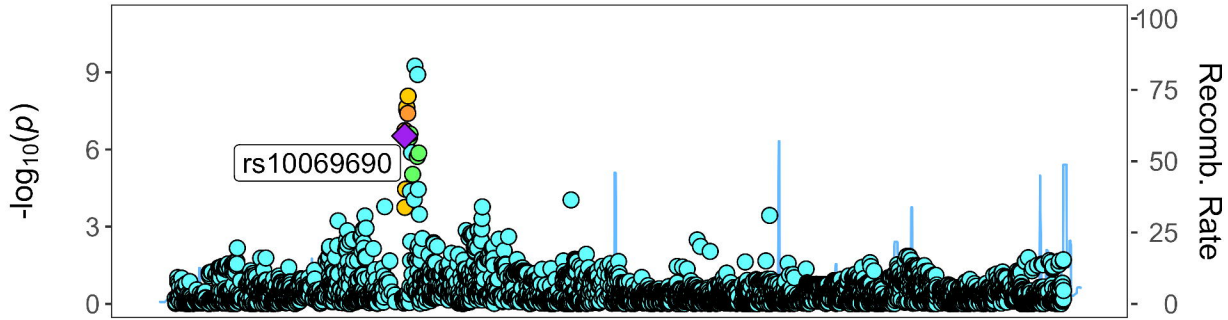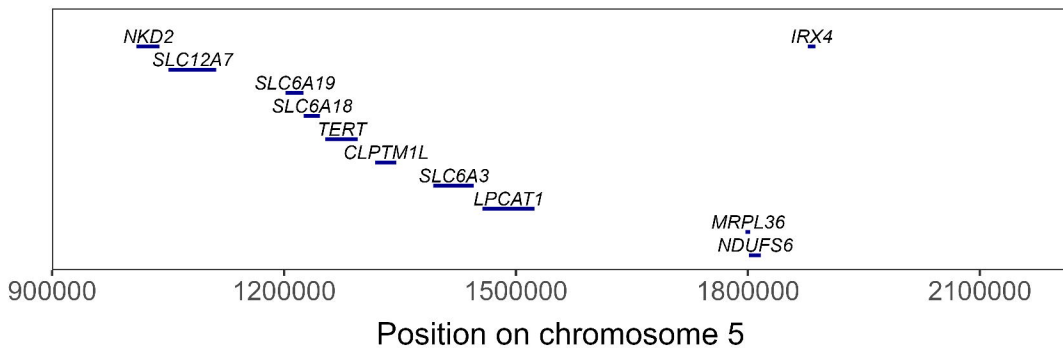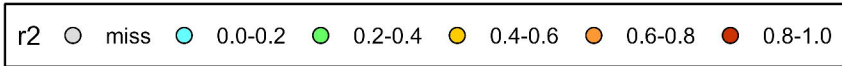

# Ovarian cancer - seborrheic keratosis

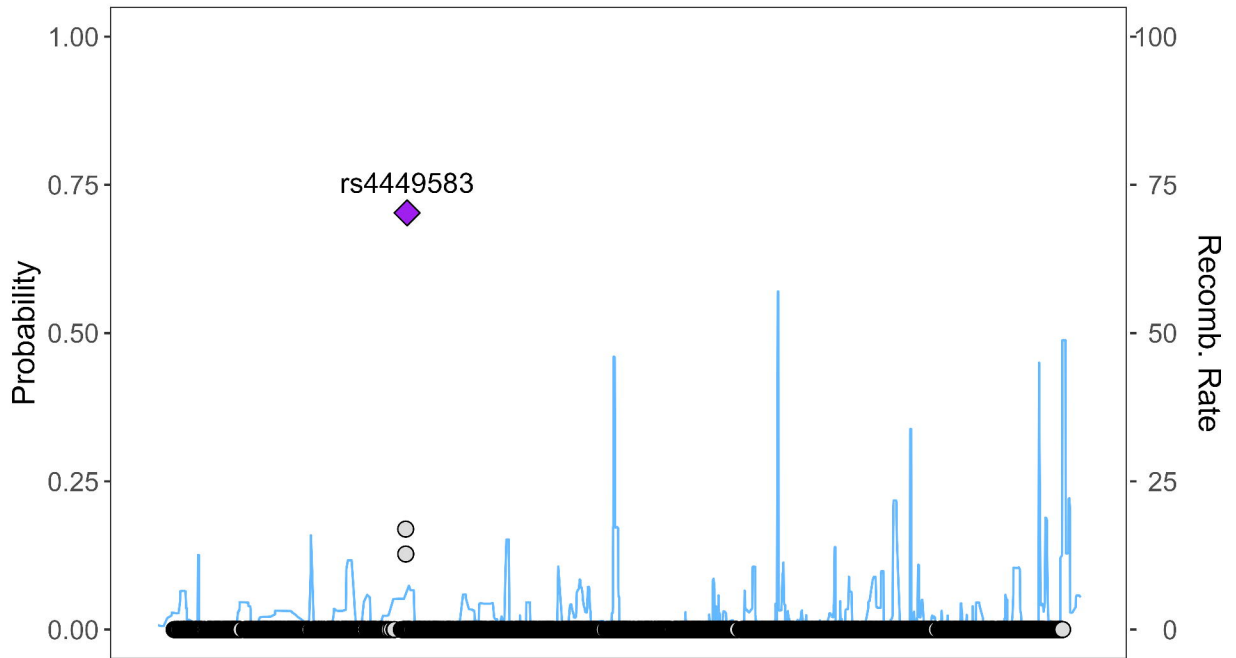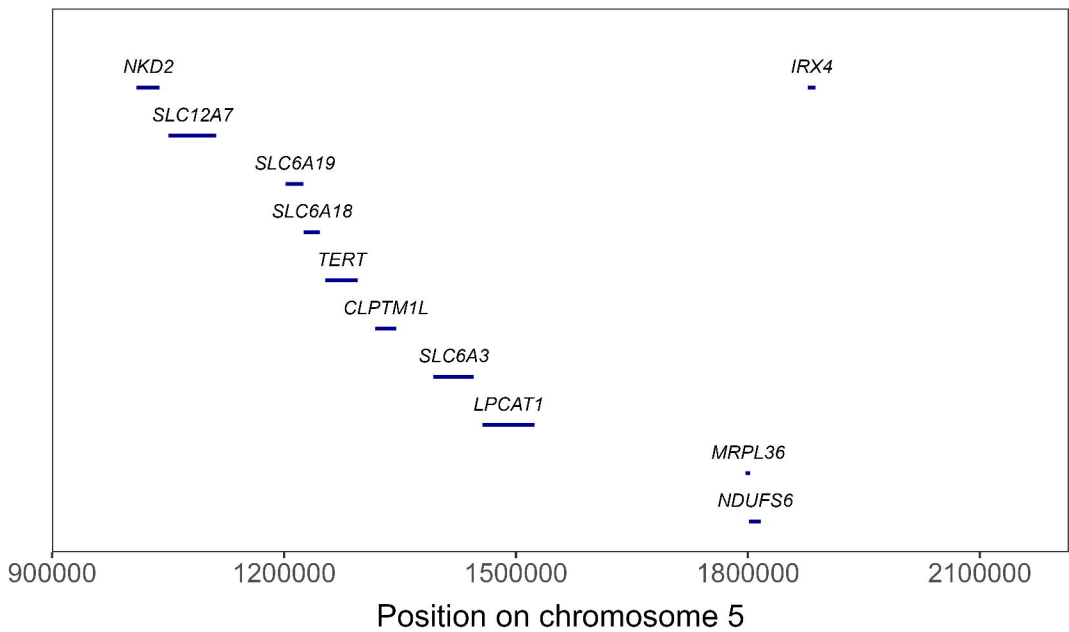

# Phenome-wide association study of ovarian cancer identifies common comorbidities and reveals shared genetics with complex diseases and biomarkers

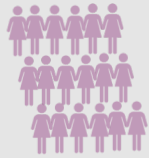

**181,203**  
female participants

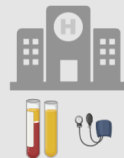

**889**  
diseases  
**43**  
biomarkers and  
physiological measures

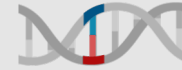

**35**  
ovarian cancer (OC) genetic variants  
**Genetic risk score (GRS)**  
for OC and the subtypes (serous, clear cell, endometrioid, and mucinous OC)

PheWAS validated the association between OC GRS and OC.

GRSs for OC or its subtypes were also associated with 12 other diseases, as well as 24 biomarkers and physiological measures

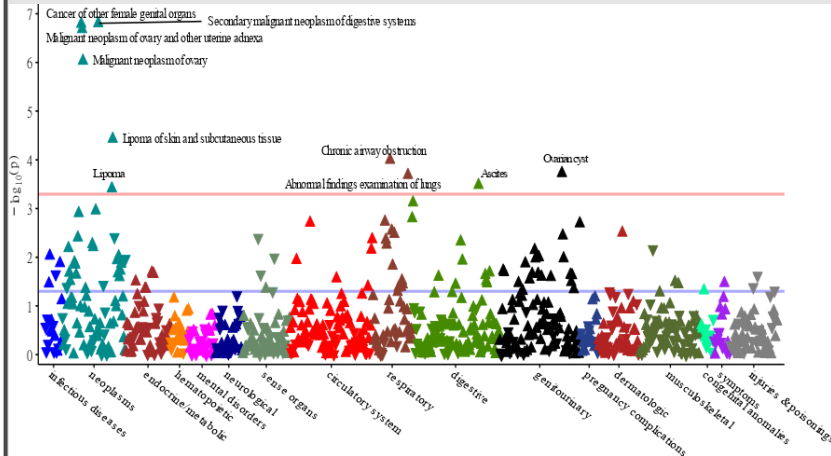

MR provided robust evidence of association between OC and the following diseases:

## (a) Respiratory system

- Chronic airway obstruction
- Abnormal findings examination of the lungs
- Lower forced vital capacity (FVC)

## (b) Digestive system

- Ascites
- Secondary malignant neoplasm of the digestive systems

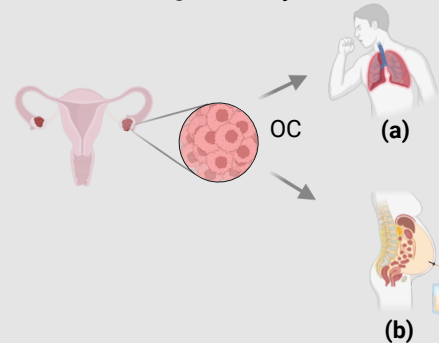

PheWAS and Colocalisation analysis identified shared locus (*TERT*, rs4449583 potential causal variant) between OC and dermatological condition.

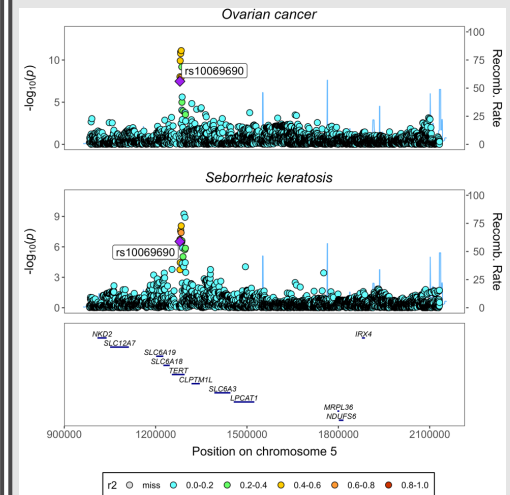

Source: https://www.medrxiv.org/content/10.1101/2023.09.08.23295233v1.full.pdf
